# Supplementary material for: A Multi-Site Assessment of Anesthetic Overdose, Hypothermic Shock, and Electrical Stunning as Methods of Euthanasia for Zebrafish (Danio rerio) Embryos and Larvae
Source: MDPI journal article supplement (doi:10.3390/biology11040546), 2022-04-01
Supplement: s1 [file s1]

## Supplementary Table S2

## Overview of treatment and dish replicates prepared by each facility

\*; behaviour was assessed for these dishes

[illegible]
