# Supplementary material for: A Multi-Site Assessment of Anesthetic Overdose, Hypothermic Shock, and Electrical Stunning as Methods of Euthanasia for Zebrafish (Danio rerio) Embryos and Larvae
Source: MDPI journal article supplement (doi:10.3390/biology11040546), 2022-04-01
Supplement: s1 [file s1]

## Supplementary Table S3

### Ethanol used in each facility

|             |                  |                                                    |
|-------------|------------------|----------------------------------------------------|
| <b>EPFL</b> | Ethanol Absolute | Fisher Chemical E/0650DF/17, Fisher Scientific, UK |
| <b>FCI</b>  | Ethanol 96%      | Fisher Chemical E/0555DF/17, Fisher Scientific, UK |
| <b>IP</b>   | Ethanol Absolute | 32205-M, SIGMA-ALDRICH, USA                        |
| <b>KU</b>   | Ethanol Absolute | 1009831011, SIGMA-ALDRICH, USA                     |
| <b>IIM</b>  | Ethanol 96%      | Alcoholes Galicia S. L., Spain                     |
| <b>UAB</b>  | Ethanol 96%      | Not available                                      |

### Blinded experiments

|             |                                                                        |
|-------------|------------------------------------------------------------------------|
| <b>EPFL</b> | No                                                                     |
| <b>FCI</b>  | Not blinded for anaesthesia overdose. Blinded for electrical stunning. |
| <b>IP</b>   | No                                                                     |
| <b>KU</b>   | No                                                                     |
| <b>IIM</b>  | Yes                                                                    |
| <b>UAB</b>  | Yes                                                                    |

### Tables presenting data per fish

Data are presented per treatment, time point, facility, and pool date. Each row represents a dish (or a group of 3 dishes for IP). Each pool is identified by the date at which the pool of eggs was fertilised.

- In the third column, the number of embryos or larvae undergoing treatment is indicated.
- In the fourth column, the number of embryos or larvae that survived 24 hours post treatment is indicated.
- The fifth column indicates the percentage of embryos or larvae that survived in each dish.
- The pH of the anaesthetic solution was measured before and after anaesthetics, buffer, and solvent were added, and these data are indicated for each day of treatment.

| <u>Treatment</u>        | <u>Pages</u> |
|-------------------------|--------------|
| Lidocaine HCl with EtOH | 2-4          |
| Lidocaine HCl           | 5-7          |
| Tricaine                | 8-10         |
| Clove oil               | 11-12        |
| Benzocaine              | 13-14        |
| 2-phenoxyethanol        | 15-16        |
| Electrical stunning     | 17           |
| Hypothermic shock       | 18           |

## Lidocaine HCl with EtOH

Lidocaine hydrochloride 1 g/L + sodium bicarbonate 2 g/L + 50 mL/L ethanol

### < 12 hpf Lidocaine HCl with EtOH

| Facility | Pool    | <12hpf | <36hpf | % Survival | pH before    | pH after     |
|----------|---------|--------|--------|------------|--------------|--------------|
| EPFL     | 22JUN20 | 14     | 0      | 0%         | 7.7          | 7.7          |
|          |         | 15     | 0      | 0%         |              |              |
|          |         | 15     | 0      | 0%         |              |              |
|          | 01JUL20 | 15     | 0      | 0%         | 7.6          | 7.8          |
|          |         | 15     | 0      | 0%         |              |              |
|          |         | 15     | 0      | 0%         |              |              |
|          | 07JUL20 | 15     | 0      | 0%         | 7.5          | 7.7          |
|          |         | 15     | 0      | 0%         |              |              |
|          |         | 15     | 0      | 0%         |              |              |
| IP       | 16NOV20 | 45     | 0      | 0%         | 7.3          | 7.7          |
|          | 23NOV20 | 45     | 0      | 0%         | 7.3          | 7.7          |
|          | 30NOV20 | 45     | 0      | 0%         | 7.3          | 7.7          |
| KU       | 25FEB20 | 10     | 0      | 0%         | 7.6          | 8.2          |
|          |         | 10     | 0      | 0%         |              |              |
|          |         | 10     | 0      | 0%         |              |              |
| IIM      | 12JAN21 | 15     | 0      | 0%         | Not measured | Not measured |
|          |         | 15     | 0      | 0%         |              |              |
|          |         | 15     | 0      | 0%         |              |              |
|          |         | 15     | 0      | 0%         |              |              |
|          |         | 15     | 0      | 0%         |              |              |
| UAB      | 27OCT20 | 10     | 0      | 0%         | 7.6          | 7.8          |
|          |         | 10     | 0      | 0%         |              |              |
|          |         | 10     | 0      | 0%         |              |              |

## 24 hpf Lidocaine HCl with EtOH

| Facility | Pool    | 24hpf | 48hpf | % Survival | pH before    | pH after     |
|----------|---------|-------|-------|------------|--------------|--------------|
| EPFL     | 23JUN20 | 15    | 0     | 0%         | 7.7          | 7.8          |
|          |         | 14    | 0     | 0%         |              |              |
|          |         | 13    | 0     | 0%         |              |              |
|          | 30JUN20 | 15    | 0     | 0%         | 7.6          | 7.7          |
|          |         | 15    | 0     | 0%         |              |              |
|          |         | 15    | 0     | 0%         |              |              |
|          | 06JUL20 | 15    | 0     | 0%         | 7.5          | 7.7          |
|          |         | 15    | 0     | 0%         |              |              |
|          |         | 15    | 0     | 0%         |              |              |
| IP       | 16NOV20 | 45    | 0     | 0%         | 7.3          | 7.7          |
|          | 23NOV20 | 45    | 0     | 0%         | 7.3          | 7.7          |
|          | 30NOV20 | 45    | 0     | 0%         | 7.3          | 7.7          |
| KU       | 25FEB20 | 10    | 0     | 0%         | 7.6          | 8.2          |
|          |         | 10    | 4     | 40%        |              |              |
|          |         | 10    | 0     | 0%         |              |              |
|          | 16JUN21 | 10    | 0     | 0%         | 7.5          | 7.9          |
|          |         | 10    | 0     | 0%         |              |              |
|          |         | 10    | 0     | 0%         |              |              |
| IIM      | 12JAN21 | 15    | 0     | 0%         | Not measured | Not measured |
|          |         | 15    | 0     | 0%         |              |              |
|          |         | 15    | 0     | 0%         |              |              |
|          |         | 15    | 0     | 0%         |              |              |
|          |         | 15    | 0     | 0%         |              |              |
| UAB      | 27OCT20 | 10    | 0     | 0%         | 7.5          | 7.7          |
|          |         | 10    | 0     | 0%         |              |              |
|          |         | 10    | 0     | 0%         |              |              |

## 48 hpf Lidocaine HCl with EtOH

| Facility | Pool    | 48hpf | 72hpf | % Survival | pH before | pH after |
|----------|---------|-------|-------|------------|-----------|----------|
| KU       | 16JUN21 | 10    | 0     | 0%         | 7.5       | 8.0      |
|          |         | 10    | 0     | 0%         |           |          |
|          |         | 10    | 0     | 0%         |           |          |

#### 4 dpf Lidocaine HCl with EtOH

| Facility | Pool    | 4dpf | 5dpf | % Survival | pH before    | pH after     |
|----------|---------|------|------|------------|--------------|--------------|
| EPFL     | 27JUN20 | 15   | 0    | 0%         | 7.6          | 7.7          |
|          |         | 15   | 0    | 0%         |              |              |
|          |         | 15   | 0    | 0%         |              |              |
|          | 03JUL20 | 15   | 0    | 0%         | 7.5          | 7.8          |
|          |         | 15   | 0    | 0%         |              |              |
|          |         | 15   | 0    | 0%         |              |              |
|          | 26AUG20 | 15   | 0    | 0%         | 7.6          | 7.9          |
|          |         | 15   | 0    | 0%         |              |              |
|          |         | 15   | 0    | 0%         |              |              |
| IP       | 26NOV20 | 41   | 0    | 0%         | 7.3          | 7.7          |
|          | 23NOV20 | 45   | 0    | 0%         | 7.2          | 7.7          |
|          | 30NOV20 | 45   | 22   | 49%        | 7.2          | 7.3          |
| IIM      | 14JAN21 | 15   | 0    | 0%         | Not measured | Not measured |
|          |         | 15   | 0    | 0%         |              |              |
|          |         | 15   | 0    | 0%         |              |              |
|          |         | 15   | 0    | 0%         |              |              |
|          |         | 15   | 0    | 0%         |              |              |
| UAB      | 27OCT20 | 10   | 0    | 0%         | 7.6          | 7.8          |
|          |         | 10   | 0    | 0%         |              |              |
|          |         | 10   | 0    | 0%         |              |              |

## Lidocaine HCl

Lidocaine hydrochloride 1 g/L + sodium bicarbonate 2 g/L

### < 12 hpf Lidocaine HCl

| Facility | Pool    | <12hpf | <36hpf | % Survival | pH before | pH after |
|----------|---------|--------|--------|------------|-----------|----------|
| EPFL     | 22JUN20 | 15     | 0      | 0%         | 7.7       | 7.7      |
|          |         | 15     | 0      | 0%         |           |          |
|          |         | 15     | 0      | 0%         |           |          |
|          | 01JUL20 | 15     | 0      | 0%         | 7.6       | 7.8      |
|          |         | 15     | 0      | 0%         |           |          |
|          |         | 15     | 0      | 0%         |           |          |
|          | 07JUL20 | 15     | 0      | 0%         | 7.5       | 7.7      |
|          |         | 15     | 1      | 7%         |           |          |
|          |         | 15     | 2      | 13%        |           |          |
| IP       | 16NOV20 | 45     | 0      | 0%         | 7.3       | 7.6      |
|          | 23NOV20 | 45     | 0      | 0%         | 7.3       | 7.6      |
|          | 30NOV20 | 45     | 17     | 38%        | 7.3       | 7.6      |
| KU       | 25FEB20 | 10     | 0      | 0%         | 7.6       | 8.2      |
|          |         | 10     | 0      | 0%         |           |          |
|          |         | 10     | 0      | 0%         |           |          |
| UAB      | 27OCT20 | 10     | 0      | 0%         | 7.7       | 7.9      |
|          |         | 10     | 0      | 0%         |           |          |
|          |         | 10     | 0      | 0%         |           |          |

### 24 hpf Lidocaine HCl

| Facility | Pool    | 24hpf | 48hpf | % Survival | pH before | pH after |
|----------|---------|-------|-------|------------|-----------|----------|
| EPFL     | 23JUN20 | 15    | 0     | 0%         | 7.7       | 7.7      |
|          |         | 15    | 0     | 0%         |           |          |
|          |         | 15    | 0     | 0%         |           |          |
|          | 30JUN20 | 14    | 0     | 0%         | 7.6       | 7.7      |
|          |         | 15    | 0     | 0%         |           |          |
|          |         | 15    | 0     | 0%         |           |          |
|          | 06JUL20 | 15    | 0     | 0%         | 7.5       | 7.7      |
|          |         | 15    | 0     | 0%         |           |          |
|          |         | 15    | 0     | 0%         |           |          |
| IP       | 16NOV20 | 45    | 5     | 11%        | 7.3       | 7.6      |
|          | 23NOV20 | 45    | 0     | 0%         | 7.3       | 7.6      |
|          | 30NOV20 | 45    | 0     | 0%         | 7.3       | 7.6      |
| KU       | 25FEB20 | 10    | 3     | 30%        | 7.6       | 8.2      |
|          |         | 10    | 3     | 30%        |           |          |
|          |         | 10    | 2     | 20%        |           |          |
|          | 16JUN21 | 10    | 0     | 0%         | 7.5       | 8.0      |
|          |         | 10    | 2     | 20%        |           |          |
|          |         | 10    | 4     | 40%        |           |          |
| UAB      | 27OCT20 | 10    | 0     | 0%         | 7.6       | 7.8      |
|          |         | 10    | 0     | 0%         |           |          |
|          |         | 10    | 0     | 0%         |           |          |

### 48 hpf Lidocaine HCl

| Facility | Pool    | 48hpf | 72hpf | % Survival | pH before | pH after |
|----------|---------|-------|-------|------------|-----------|----------|
| KU       | 16JUN21 | 10    | 0     | 0%         | 7.6       | 8.0      |
|          |         | 10    | 4     | 40%        |           |          |
|          |         | 10    | 0     | 0%         |           |          |

#### 4 dpf Lidocaine HCl

| Facility | Pool    | 4dpf | 5dpf | % Survival | pH before | pH after |
|----------|---------|------|------|------------|-----------|----------|
| EPFL     | 27JUN20 | 15   | 5    | 33%        | 7.6       | 7.7      |
|          |         | 15   | 6    | 40%        |           |          |
|          |         | 15   | 2    | 13%        |           |          |
|          | 03JUL20 | 14   | 3    | 21%        | 7.5       | 7.8      |
|          |         | 15   | 2    | 13%        |           |          |
|          |         | 15   | 0    | 0%         |           |          |
|          | 26AUG20 | 15   | 3    | 20%        | 7.6       | 7.9      |
|          |         | 15   | 0    | 0%         |           |          |
|          |         | 14   | 0    | 0%         |           |          |
| IP       | 26NOV20 | 43   | 35   | 81%        | 7.3       | 7.6      |
|          | 23NOV20 | 45   | 39   | 87%        | 7.2       | 7.6      |
|          | 30NOV20 | 45   | 43   | 96%        | 7.2       | 7.6      |
| UAB      | 27OCT20 | 10   | 0    | 0%         | 7.6       | 7.8      |
|          |         | 10   | 0    | 0%         |           |          |
|          |         | 10   | 0    | 0%         |           |          |

## Tricaine

### Tricaine 1 g/L with 2 g/L Sodium bicarbonate

**EPFL and IP:** Tricaine, Ethyl 3-aminobenzoate methanesulfonate salt, Sigma-aldrich, A5040, USA

**UAB:** Tricaine, Ethyl 3-aminobenzoate methanesulfonate, Sigma-aldrich, E10521, USA

#### < 12 hpf Tricaine

| Facility | Pool    | <12hpf | <36hpf | % Survival | pH before | pH after |
|----------|---------|--------|--------|------------|-----------|----------|
| EPFL     | 22JUN20 | 15     | 14     | 93%        | 7.7       | 7.7      |
|          |         | 15     | 13     | 87%        |           |          |
|          |         | 15     | 15     | 100%       |           |          |
|          | 01JUL20 | 15     | 15     | 100%       | 7.6       | 7.8      |
|          |         | 15     | 15     | 100%       |           |          |
|          |         | 15     | 15     | 100%       |           |          |
|          | 07JUL20 | 15     | 15     | 100%       | 7.5       | 7.7      |
|          |         | 15     | 15     | 100%       |           |          |
|          |         | 15     | 15     | 100%       |           |          |
| IP       | 16NOV20 | 45     | 38     | 84%        | 7.3       | 7.1      |
|          | 23NOV20 | 45     | 40     | 89%        | 7.3       | 7.1      |
|          | 30NOV20 | 45     | 44     | 98%        | 7.3       | 7.2      |
| UAB      | 27OCT20 | 10     | 0      | 0%         | 7.6       | 7.6      |
|          |         | 10     | 0      | 0%         |           |          |
|          |         | 10     | 2      | 20%        |           |          |



## 24 hpf Tricaine

| Facility | Pool    | 24hpf | 48hpf | % Survival | pH before | pH after |
|----------|---------|-------|-------|------------|-----------|----------|
| EPFL     | 23JUN20 | 15    | 15    | 100%       | 7.7       | 7.8      |
|          |         | 15    | 15    | 100%       |           |          |
|          |         | 15    | 15    | 100%       |           |          |
|          | 30JUN20 | 15    | 15    | 100%       | 7.6       | 7.7      |
|          |         | 15    | 15    | 100%       |           |          |
|          |         | 15    | 15    | 100%       |           |          |
|          | 06JUL20 | 15    | 15    | 100%       | 7.5       | 7.7      |
|          |         | 15    | 15    | 100%       |           |          |
|          |         | 15    | 15    | 100%       |           |          |
| IP       | 16NOV20 | 45    | 43    | 96%        | 7.3       | 7.1      |
|          | 23NOV20 | 45    | 45    | 100%       | 7.3       | 7.1      |
|          | 30NOV20 | 44    | 44    | 100%       | 7.3       | 7.2      |
| UAB      | 27OCT20 | 10    | 10    | 100%       | 7.6       | 7.6      |
|          |         | 10    | 10    | 100%       |           |          |
|          |         | 10    | 10    | 100%       |           |          |

#### 4 dpf Tricaine

| Facility | Pool    | 4dpf | 5dpf | % Survival | pH before | pH after |
|----------|---------|------|------|------------|-----------|----------|
| EPFL     | 27JUN20 | 15   | 15   | 100%       | 7.6       | 7.7      |
|          |         | 15   | 15   | 100%       |           |          |
|          |         | 15   | 15   | 100%       |           |          |
|          | 03JUL20 | 15   | 15   | 100%       | 7.5       | 7.7      |
|          |         | 15   | 15   | 100%       |           |          |
|          |         | 15   | 14   | 93%        |           |          |
|          | 26AUG20 | 15   | 15   | 100%       | 7.6       | 7.9      |
|          |         | 13   | 13   | 100%       |           |          |
|          |         | 15   | 15   | 100%       |           |          |
| IP       | 26NOV20 | 45   | 45   | 100%       | 7.3       | 7.2      |
|          | 23NOV20 | 45   | 45   | 100%       | 7.2       | 7.1      |
|          | 30NOV20 | 44   | 43   | 98%        | 7.2       | 7.1      |
| UAB      | 27OCT20 | 10   | 10   | 100%       | 7.7       | 7.6      |
|          |         | 10   | 10   | 100%       |           |          |
|          |         | 10   | 10   | 100%       |           |          |

## Clove oil 0.1%

1:10 clove oil in ethanol, then 10 mL/L

**EPFL and FCI:** Clove Oil, Sigma-Aldrich, C8392, USA

**UAB:** Essential clove oil, Sol Natura, 2,215 lab 122735, Spain

### < 12 hpf Clove oil

| Facility | Pool    | <12hpf | <36hpf | % Survival | pH before    | pH after     |
|----------|---------|--------|--------|------------|--------------|--------------|
| EPFL     | 22JUN20 | 13     | 0      | 0%         | 7.7          | 7.4          |
|          |         | 14     | 0      | 0%         |              |              |
|          |         | 10     | 0      | 0%         |              |              |
|          | 01JUL20 | 15     | 0      | 0%         | 7.6          | 7.4          |
|          |         | 15     | 0      | 0%         |              |              |
|          |         | 15     | 0      | 0%         |              |              |
|          | 07JUL20 | 15     | 0      | 0%         | 7.5          | 7.6          |
|          |         | 15     | 0      | 0%         |              |              |
|          |         | 15     | 0      | 0%         |              |              |
| UAB      | 27OCT20 | 10     | 0      | 0%         | Not measured | Not measured |
|          |         | 10     | 0      | 0%         |              |              |
|          |         | 10     | 0      | 0%         |              |              |

## 24 hpf Clove oil

| Facility | Pool    | 24hpf | 48hpf | % Survival | pH before    | pH after     |
|----------|---------|-------|-------|------------|--------------|--------------|
| EPFL     | 23JUN20 | 15    | 0     | 0%         | 7.7          | 7.5          |
|          |         | 14    | 0     | 0%         |              |              |
|          |         | 15    | 0     | 0%         |              |              |
|          | 30JUN20 | 12    | 0     | 0%         | 7.6          | 7.6          |
|          |         | 15    | 0     | 0%         |              |              |
|          |         | 13    | 0     | 0%         |              |              |
|          | 06JUL20 | 15    | 0     | 0%         | 7.5          | 7.4          |
|          |         | 15    | 0     | 0%         |              |              |
|          |         | 15    | 0     | 0%         |              |              |
| FCI      | 17NOV20 | 15    | 0     | 0%         | 7.0          | 7.2          |
|          |         | 15    | 0     | 0%         |              |              |
|          |         | 15    | 0     | 0%         |              |              |
|          | 24NOV20 | 15    | 0     | 0%         | 6.8          | 7.1          |
|          |         | 15    | 0     | 0%         |              |              |
|          |         | 15    | 0     | 0%         |              |              |
|          | 01DEC20 | 10    | 0     | 0%         | 6.7          | 7.4          |
|          |         | 10    | 0     | 0%         |              |              |
|          |         | 15    | 0     | 0%         |              |              |
| UAB      | 27OCT20 | 10    | 0     | 0%         | Not measured | Not measured |
|          |         | 10    | 0     | 0%         |              |              |
|          |         | 10    | 0     | 0%         |              |              |

## 4 dpf Clove oil

| Facility | Pool    | 4dpf | 5dpf | % Survival | pH before    | pH after     |
|----------|---------|------|------|------------|--------------|--------------|
| EPFL     | 27JUN20 | 15   | 0    | 0%         | 7.6          | 7.5          |
|          |         | 15   | 0    | 0%         |              |              |
|          |         | 15   | 0    | 0%         |              |              |
|          | 03JUL20 | 15   | 0    | 0%         | 7.5          | 7.4          |
|          |         | 15   | 0    | 0%         |              |              |
|          |         | 15   | 0    | 0%         |              |              |
|          | 26AUG20 | 15   | 0    | 0%         | 7.6          | 7.1          |
|          |         | 15   | 0    | 0%         |              |              |
|          |         | 15   | 0    | 0%         |              |              |
| UAB      | 27OCT20 | 10   | 0    | 0%         | Not measured | Not measured |
|          |         | 10   | 0    | 0%         |              |              |
|          |         | 10   | 0    | 0%         |              |              |

## Benzocaine 1g/L

20 g/L in ethanol, then 50 mL/L

### < 12 hpf Benzocaine

| Facility | Pool    | <12hpf | <36hpf | % Survival | pH before | pH after |
|----------|---------|--------|--------|------------|-----------|----------|
| EPFL     | 22JUN20 | 15     | 4      | 27%        | 7.7       | 7.6      |
|          |         | 14     | 4      | 29%        |           |          |
|          |         | 15     | 4      | 27%        |           |          |
|          | 01JUL20 | 15     | 0      | 0%         | 7.6       | 7.6      |
|          |         | 14     | 0      | 0%         |           |          |
|          |         | 15     | 0      | 0%         |           |          |
|          | 07JUL20 | 15     | 0      | 0%         | 7.5       | 7.7      |
|          |         | 14     | 5      | 36%        |           |          |
|          |         | 15     | 3      | 20%        |           |          |

### 24 hpf Benzocaine

| Facility | Pool    | 24hpf | 48hpf | % Survival | pH before | pH after |
|----------|---------|-------|-------|------------|-----------|----------|
| EPFL     | 23JUN20 | 15    | 15    | 100%       | 7.7       | 7.6      |
|          |         | 15    | 15    | 100%       |           |          |
|          |         | 14    | 14    | 100%       |           |          |
|          | 30JUN20 | 15    | 15    | 100%       | 7.6       | 7.7      |
|          |         | 14    | 14    | 100%       |           |          |
|          |         | 14    | 14    | 100%       |           |          |
|          | 06JUL20 | 15    | 15    | 100%       | 7.5       | 7.6      |
|          |         | 15    | 15    | 100%       |           |          |
|          |         | 15    | 14    | 93%        |           |          |
| FCI      | 17NOV20 | 15    | 15    | 100%       | 7.0       | 7.4      |
|          |         | 15    | 15    | 100%       |           |          |
|          |         | 15    | 15    | 100%       |           |          |
|          | 24NOV20 | 15    | 15    | 100%       | 6.8       | 7.1      |
|          |         | 15    | 15    | 100%       |           |          |
|          |         | 14    | 12    | 86%        |           |          |
|          | 01DEC20 | 10    | 10    | 100%       | 6.7       | 7.5      |
|          |         | 10    | 10    | 100%       |           |          |
|          |         | 10    | 10    | 100%       |           |          |

#### 4 dpf Benzocaine

| Facility | Pool    | 4dpf | 5dpf | % Survival | pH before | pH after |
|----------|---------|------|------|------------|-----------|----------|
| EPFL     | 27JUN20 | 10   | 0    | 0%         | 7.6       | 7.7      |
|          |         | 14   | 0    | 0%         |           |          |
|          |         | 13   | 0    | 0%         |           |          |
|          | 03JUL20 | 15   | 0    | 0%         | 7.5       | 7.6      |
|          |         | 15   | 0    | 0%         |           |          |
|          |         | 15   | 5    | 33%        |           |          |
|          | 26AUG20 | 15   | 0    | 0%         | 7.6       | 7.3      |
|          |         | 15   | 0    | 0%         |           |          |
|          |         | 13   | 0    | 0%         |           |          |

## 2-Phenoxyethanol 3 mL/L

**EPFL:** 2-Phenoxyethanol, Sigma-Aldrich, 77699, USA

**FCI:** Aqua-Sed, VETARK, UK

### < 12 hpf 2-Phenoxyethanol

| Facility | Pool    | <12hpf | <36hpf | % Survival | pH before | pH after |
|----------|---------|--------|--------|------------|-----------|----------|
| EPFL     | 22JUN20 | 15     | 1      | 7%         | 7.7       | 7.5      |
|          |         | 13     | 2      | 15%        |           |          |
|          |         | 15     | 3      | 20%        |           |          |
|          | 01JUL20 | 15     | 0      | 0%         | 7.6       | 7.4      |
|          |         | 13     | 0      | 0%         |           |          |
|          |         | 15     | 0      | 0%         |           |          |
|          | 07JUL20 | 15     | 0      | 0%         | 7.5       | 7.6      |
|          |         | 13     | 0      | 0%         |           |          |
|          |         | 15     | 0      | 0%         |           |          |

### 24 hpf 2-Phenoxyethanol

| Facility | Pool    | 24hpf | 48hpf | % Survival | pH before | pH after |
|----------|---------|-------|-------|------------|-----------|----------|
| EPFL     | 23JUN20 | 15    | 15    | 100%       | 7.7       | 7.5      |
|          |         | 15    | 15    | 100%       |           |          |
|          |         | 15    | 15    | 100%       |           |          |
|          | 30JUN20 | 15    | 15    | 100%       | 7.6       | 7.7      |
|          |         | 14    | 14    | 100%       |           |          |
|          |         | 16    | 16    | 100%       |           |          |
|          | 06JUL20 | 15    | 15    | 100%       | 7.5       | 7.4      |
|          |         | 15    | 15    | 100%       |           |          |
|          |         | 15    | 15    | 100%       |           |          |
|          | 17NOV20 | 15    | 15    | 100%       | 7         | 7.4      |
|          |         | 15    | 15    | 100%       |           |          |
|          |         | 15    | 15    | 100%       |           |          |
| FCI      | 24NOV20 | 15    | 15    | 100%       | 6.8       | 7.5      |
|          |         | 10    | 10    | 100%       |           |          |
|          |         | 10    | 10    | 100%       |           |          |
|          | 01DEC20 | 10    | 10    | 100%       | 6.7       | 7.5      |
|          |         | 10    | 10    | 100%       |           |          |
|          |         | 10    | 10    | 100%       |           |          |

#### 4 dpf 2-Phenoxyethanol

| Facility | Pool    | 4dpf | 5dpf | % Survival | pH before | pH after |
|----------|---------|------|------|------------|-----------|----------|
| EPFL     | 27JUN20 | 15   | 14   | 93%        | 7.6       | 7.5      |
|          |         | 10   | 8    | 80%        |           |          |
|          |         | 13   | 11   | 85%        |           |          |
|          | 03JUL20 | 15   | 14   | 93%        | 7.5       | 7.6      |
|          |         | 15   | 15   | 100%       |           |          |
|          |         | 15   | 15   | 100%       |           |          |
|          | 26AUG20 | 15   | 14   | 93%        | 7.6       | 7.3      |
|          |         | 15   | 13   | 87%        |           |          |
|          |         | 15   | 14   | 93%        |           |          |



## Electrical Stunning

### 24 hpf Electrical stunning

| Facility | Pool    | 24hpf | 48hpf | % Survival |
|----------|---------|-------|-------|------------|
| FCI      | 15DEC20 | 15    | 0     | 0%         |
|          |         | 15    | 0     | 0%         |
|          |         | 15    | 0     | 0%         |
|          |         | 15    | 0     | 0%         |
|          |         | 15    | 0     | 0%         |

### 4 dpf Electrical stunning

| Facility | Pool    | 4dpf | 5dpf | % Survival |
|----------|---------|------|------|------------|
| FCI      | 15DEC20 | 16   | 0    | 0%         |
|          |         | 13   | 0    | 0%         |
|          |         | 14   | 0    | 0%         |
|          |         | 13   | 0    | 0%         |
|          |         | 16   | 0    | 0%         |
|          | 08DEC20 | 15   | 0    | 0%         |
|          |         | 15   | 0    | 0%         |
|          |         | 15   | 0    | 0%         |
|          |         | 15   | 0    | 0%         |
|          |         | 15   | 0    | 0%         |
|          |         | 15   | 0    | 0%         |
|          |         | 15   | 0    | 0%         |
|          |         | 15   | 0    | 0%         |
|          |         | 15   | 0    | 0%         |
|          |         | 22   | 0    | 0%         |

## Hypothermic shock

### < 12 hpf Hypothermic shock

| Facility | Pool    | <12hpf | <36hpf | % Survival |
|----------|---------|--------|--------|------------|
| IP       | 16NOV20 | 45     | 34     | 76%        |
|          | 23NOV20 | 45     | 40     | 89%        |
|          | 30NOV20 | 45     | 39     | 87%        |
| UAB      | 27OCT20 | 10     | 5      | 50%        |
|          |         | 10     | 2      | 20%        |
|          |         | 10     | 4      | 40%        |

### 24 hpf Hypothermic shock

| Facility | Pool    | 24hpf | 48hpf | % Survival |
|----------|---------|-------|-------|------------|
| IP       | 16NOV20 | 45    | 39    | 87%        |
|          | 23NOV20 | 45    | 40    | 89%        |
|          | 30NOV20 | 45    | 26    | 58%        |
| UAB      | 27OCT20 | 10    | 10    | 100%       |
|          |         | 10    | 10    | 100%       |
|          |         | 10    | 9     | 90%        |

### 4 dpf Hypothermic shock

| Facility | Pool    | 4dpf | 5dpf | % Survival |
|----------|---------|------|------|------------|
| IP       | 26NOV20 | 44   | 44   | 100%       |
|          | 23NOV20 | 45   | 45   | 100%       |
|          | 30NOV20 | 45   | 45   | 100%       |
| UAB      | 27OCT20 | 10   | 10   | 100%       |
|          |         | 10   | 10   | 100%       |
|          |         | 10   | 10   | 100%       |
