# Supplementary material for: A Multi-Site Assessment of Anesthetic Overdose, Hypothermic Shock, and Electrical Stunning as Methods of Euthanasia for Zebrafish (Danio rerio) Embryos and Larvae
Source: MDPI journal article supplement (doi:10.3390/biology11040546), 2022-04-01
Supplement: s1 [file s1]

Supplementary Table S1

Husbandry conditions

- Adult system water conditions per facility      page 1
- Adult feeds per facility      page 2
- Spawning and incubation conditions      page 3

- Adult system water conditions per facility

| Facility | Adult System Water |                  |                      |                                |                                             |                                             |                |                  |                           |                 |               |                                |
|----------|--------------------|------------------|----------------------|--------------------------------|---------------------------------------------|---------------------------------------------|----------------|------------------|---------------------------|-----------------|---------------|--------------------------------|
|          | pH                 | Temperature (°C) | Conductivity (mS/cm) | Ammonia (ppm NH <sub>3</sub> ) | Nitrite (ppm NO <sub>2</sub> <sup>-</sup> ) | Nitrate (ppm NO <sub>3</sub> <sup>-</sup> ) | Hardness (°GH) | Alkalinity (°KH) | Light cycle (light/night) | Reverse Osmosis | Recirculation | Carbon filter on recirculation |
| EPFL     | 7.5-7.8            | 26.0             | 0.411-0.425          | 0                              | /                                           | 2.0-4.7                                     | 5-6            | /                | 14h/10h                   | Yes             | Yes           | No                             |
| FCI      | 7.5-8.0            | 27.7-28.0        | 0.420-0.450          | 0                              | 0                                           | 27-29                                       | 3              | 2-3              | 14h/10h                   | Yes             | Yes           | Yes                            |
| IP       | 7.1                | 27.7-28.4        | 0.520-0.532          | < 0.05                         | 0.1                                         | 20                                          | 1              | 2                | 14h/10h                   | Yes             | Yes           | Yes                            |
| KU       | 7.3                | 28.0-28.4        | 0.800-0.812          | < 0.05                         | 0.02                                        | 20                                          | 7              | 4                | 14h/10h                   | Yes             | Yes           | Yes                            |
| IIM      | 7.0                | 28.0             | 0.700                | 0                              | 0                                           | /                                           | 1              | /                | 12h/12h                   | No              | Yes           | No                             |
| UAB      | 7.3                | 27.0             | 0.850                | < 0.05                         | 0.5                                         | < 50                                        | 4              | 4                | 14h/10h                   | Yes             | Yes           | Yes                            |

/; data are not available

- Adult feeds per facility

| Facility | Adult Feeds                       |                                    |
|----------|-----------------------------------|------------------------------------|
|          | List dry feed used for all stages | List live feed used for all stages |
| EPFL     | Sparos                            | Paramecia / Artemia                |
| FCI      | ZM, SAFE caviar                   | Paramecia / Artemia                |
| IP       | Gemma Micro                       | Rotifers                           |
| KU       | ZM, SDS, and Sparos               | Artemia                            |
| IIM      | Nutrafin max                      | Artemia                            |
| UAB      | Sparos                            | Artemia                            |

- Spawning and incubation conditions

Most used strains were Wild Type (WT) AB. These were second generation progeny from the Zebrafish International Resource Center (ZIRC, Eugene, OR, USA) or later generations.

| Faculty | Mating          |            |               | Incubator conditions |                              |              |                                             |
|---------|-----------------|------------|---------------|----------------------|------------------------------|--------------|---------------------------------------------|
|         | Spawning set-up | Time mated | Spawning time | Strain               | Incubator's temperature (°C) | Embryo media | Light cycle during incubation (light/night) |
| EPFL    | Multiple pairs  | Yes        | 09:30         | WT AB                | 28.5                         | System water | No                                          |
| FCI     | Mass spawning   | No         | 08:00-09:00   | WT AB                | 28.0                         | 0.5 X E2     | No                                          |
| IP      | Multiple pairs  | Yes        | 09:00         | WT AB                | 28.0                         | E3           | Yes, 14h/10h                                |
| KU      | Multiple pairs  | No         | 08:30         | WT AB                | 28.5                         | E3           | No                                          |
| IIM     | Mass spawning   | Yes        | 09:00         | WT                   | 28.0                         | System water | Yes, 12h/12h                                |
| UAB     | Multiple pairs  | Yes        | 08:00         | WT AB                | 28.0                         | In-house mix | Yes, 12h/12h                                |

Recipes for embryo media:

FCI: 7.5 mM NaCl; 0.25 mM KCl; 0.5 mM CaCl<sub>2</sub>; 0.5 mM MgSO<sub>4</sub>; 75 µM KH<sub>2</sub>PO<sub>4</sub>; 25 µM Na<sub>2</sub>HPO<sub>4</sub>; 0.35 mM NaHCO<sub>3</sub>; 0.5 mg/L Methylene Blue.

IP: 4.5 mM NaCl; 0.17 mM KCl; 0.4 mM CaCl<sub>2</sub>.

KU: 5 mM NaCl; 0.17 mM KCl; 0.33 mM CaCl<sub>2</sub>; 0.33 mM MgSO<sub>4</sub>.

UAB: Distilled water; NaCl; NaHCO<sub>3</sub>; pH 7.3; conductivity 0.8 +/- 0.1 mS/cm.
