# Supplementary material for: A Multi-Site Assessment of Anesthetic Overdose, Hypothermic Shock, and Electrical Stunning as Methods of Euthanasia for Zebrafish (Danio rerio) Embryos and Larvae
Source: MDPI journal article supplement (doi:10.3390/biology11040546), 2022-04-01
Supplement: s1 [file s1]

**Pool of fertilized embryos from mass spawning or multiple pairs**

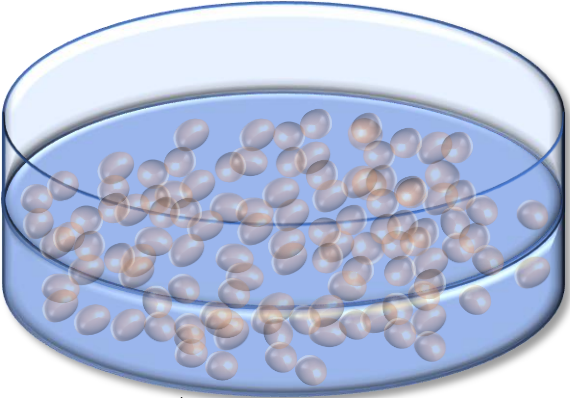

**Random distribution,  
10-15 embryos per dish**

**Treatment for 1 hour  
or 1 min for electrical stunning**

**<12 hpf**

**24 hpf**

**4 dpf**

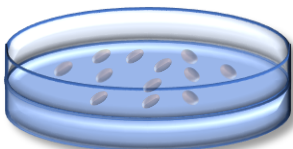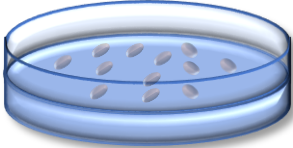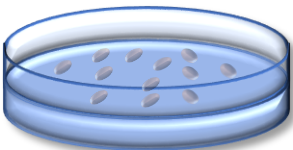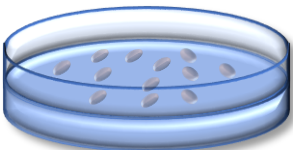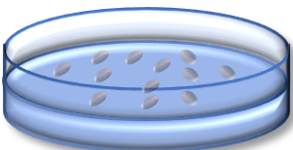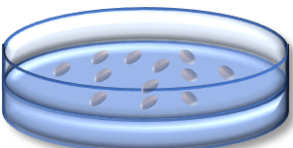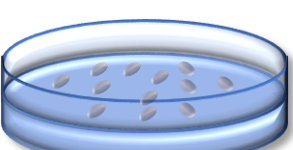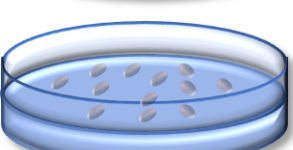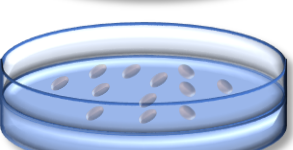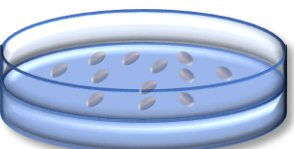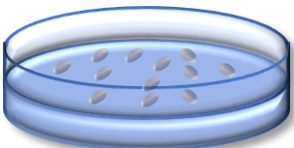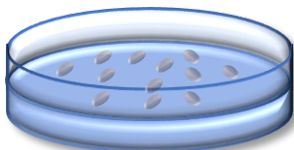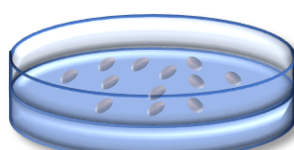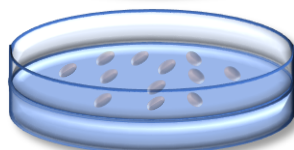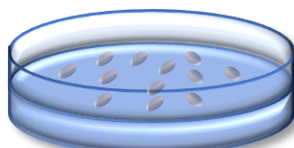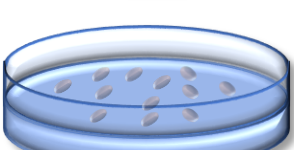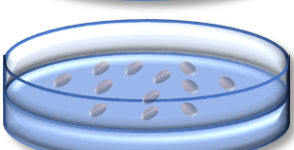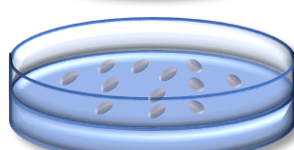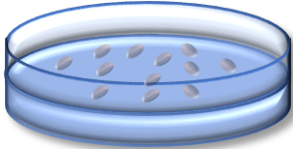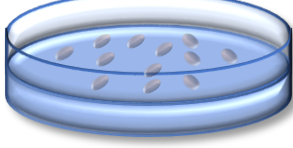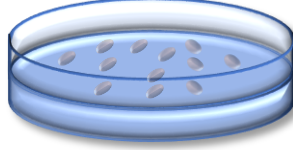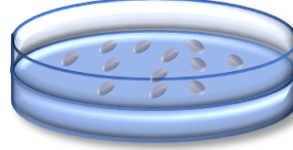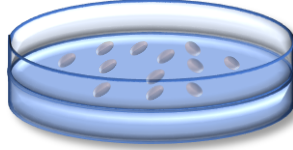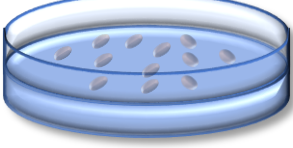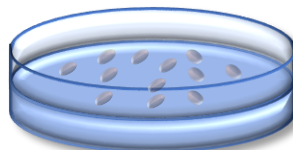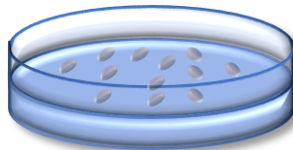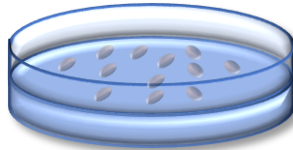

**Fresh  
media  
24 hour  
recovery**

**Control**

**Treatment:  
Lidocaine HCl; Lidocaine  
HCl + EtOH; Tricaine;  
Benzocaine; Clove oil; 2-PE;  
Electrical stunning;  
Hypothermic shock**

**Record  
survival rate**
